# Supplementary material
Source: Elsevier journal article supplement (https://www.sciencedirect.com/science/article/pii/S0213911114002763)
Supplement: mmc1 [file S0213911114002763:mmc1.pdf]

**Table I.** Questions and answer options of the questionnaire

| In these questions we do not ask you about your specific work activity, but about YOUR OPINION on the functioning of health surveillance IN GENERAL IN CATALONIA |                                                                                                                                                                                                                                                                           |                          |      |        |        |                       |            |
|------------------------------------------------------------------------------------------------------------------------------------------------------------------|---------------------------------------------------------------------------------------------------------------------------------------------------------------------------------------------------------------------------------------------------------------------------|--------------------------|------|--------|--------|-----------------------|------------|
| No.                                                                                                                                                              | QUESTION                                                                                                                                                                                                                                                                  | ANSWER OPTIONS           |      |        |        |                       |            |
| 1                                                                                                                                                                | How would you rate communication channels between prevention services and the National Health System?                                                                                                                                                                     | Very good                | Good | Medium | Poor   | Very poor             | Don't know |
| 2                                                                                                                                                                | How would you rate communication channels between prevention services and Employers' Mutual Insurance Companies?                                                                                                                                                          | Very good                | Good | Medium | Poor   | Very poor             | Don't know |
| 3                                                                                                                                                                | How would you rate the degree of referral of suspected occupational or work related cases by prevention services to Mutual Insurance Companies?                                                                                                                           | Very high                | High | Medium | Low    | Very low              | Don't know |
| 4                                                                                                                                                                | How would you rate the quality of collective / epidemiological health surveillance, as it is currently performed?                                                                                                                                                         | Very good                | Good | Medium | Poor   | Very poor             | Don't know |
| 5                                                                                                                                                                | In general terms, do you think that health examinations, as they are currently performed, are specific, ie targeted to the risks to which workers are exposed?                                                                                                            | Always/<br>nearly always |      | Often  | Rarely | Never/<br>hardly ever | Don't know |
| 6                                                                                                                                                                | In general terms, do you think that health examinations, as they are currently performed, are guided by scientific evidence?                                                                                                                                              | Always/<br>nearly always |      | Often  | Rarely | Never/<br>hardly ever | Don't know |
| 7                                                                                                                                                                | Do you think that the potential capabilities of occupational physicians and nurses are currently well utilized in the health surveillance field?                                                                                                                          | Always/<br>nearly always |      | Often  | Rarely | Never/<br>hardly ever | Don't know |
| 8                                                                                                                                                                | Do you think that health surveillance, as currently formulated, meets the objective of early detection of health damage related to work?                                                                                                                                  | Always/<br>nearly always |      | Often  | Rarely | Never/<br>hardly ever | Don't know |
| 9                                                                                                                                                                | In terms of efficiency, do you think that the economic cost of health surveillance is well spent in order to protect the health of workers?                                                                                                                               | Always/<br>nearly always |      | Often  | Rarely | Never/<br>hardly ever | Don't know |
| 10                                                                                                                                                               | In general terms, do you think that health examinations, as they are currently performed, have an effective contribution to improve the occupational risk prevention system (vg. by introducing adaptations or improving exposures and/or working conditions of workers)? | Always/<br>nearly always |      | Often  | Rarely | Never/<br>hardly ever | Don't know |
